# Supplementary material for: Machine-learned interatomic potentials for alloys and alloy phase diagrams
Source: Springer Nature journal article supplement (doi:10.1038/s41524-020-00477-2), 2021-01-29
Supplement: 41524_2020_477_MOESM1_ESM.pdf [file 41524_2020_477_MOESM1_ESM.pdf]

# Supplementary Information: Machine-Learned Interatomic Potentials for Alloys

Conrad W. Rosenbrock\* and Gus L. W. Hart

*Department of Physics and Astronomy, Brigham Young University, Provo UT USA 84602*

Konstantin Gubaev and Alexander V. Shapeev

*Skolkovo Institute of Science and Technology, Skolkovo Innovation Center, Nobel str. 3, Moscow, 143026 Russia*

Livia B. Pártay

*Department of Chemistry, University of Reading, Whiteknights, Reading, RG6 6AD, UK*

Noam Bernstein

*Center for Computational Materials Science, U. S. Naval Research Laboratory, Washington DC 20375, USA*

Gábor Csányi

*Department of Engineering, University of Cambridge, Trumpington Street, Cambridge, CB2 1PZ, UK*

(Dated: July 21, 2020)

Supplementary phonon dispersion curve plots for the machine-learned potentials discussed in the main paper.

## I. SUPPLEMENTARY NOTES

This section presents phonon dispersion curves for 65 enumerated FCC superstructures with cell sizes from 2 through 6. Special paths in  $k$ -space were calculated using the seekpath [1, 2] package. Integrated RMS error is displayed in parentheses next to each potential in the

legend. It is calculated using all eigenvalues at each  $k$ -point on a  $13 \times 13 \times 13$  grid in the Brillouin zone. Configurations that the potentials used during fitting have “Training” in the title. Those configurations for which phonons are predicted have “Prediction” in the title. Of the 65 configurations, 29 were used for fitting and 36 for validation.

---

[1] Yoyo Hinuma, Giovanni Pizzi, Yu Kumagai, Fumiyasu Oba, and Isao Tanaka. Band structure diagram paths based on crystallography. *Computational Materials Sci-*

*ence*, 128:140 – 184, 2017.

[2] Atsushi Togo and Isao Tanaka. `{Spglib}`: a software library for crystal symmetry search. *arXiv e-prints*, page arXiv:1808.01590, Aug 2018.

---

\* rosenbrockc@gmail.com

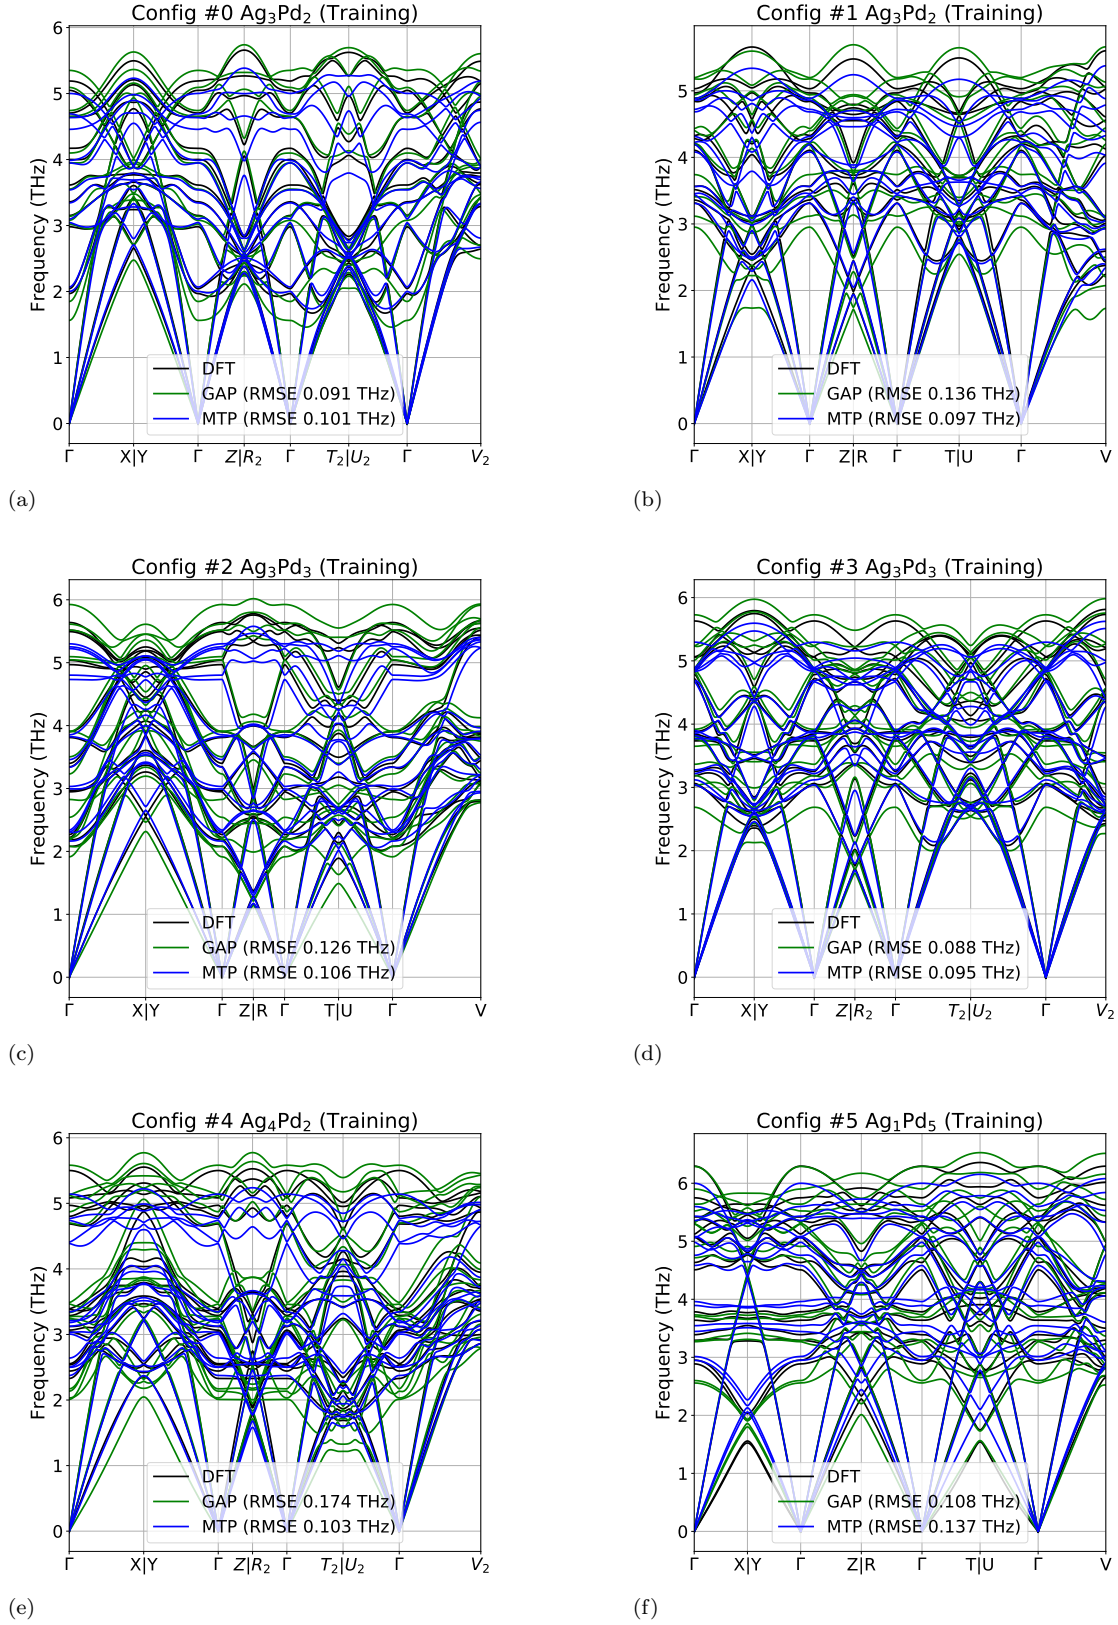

FIG. 1: Phonon predictions for selected configurations.

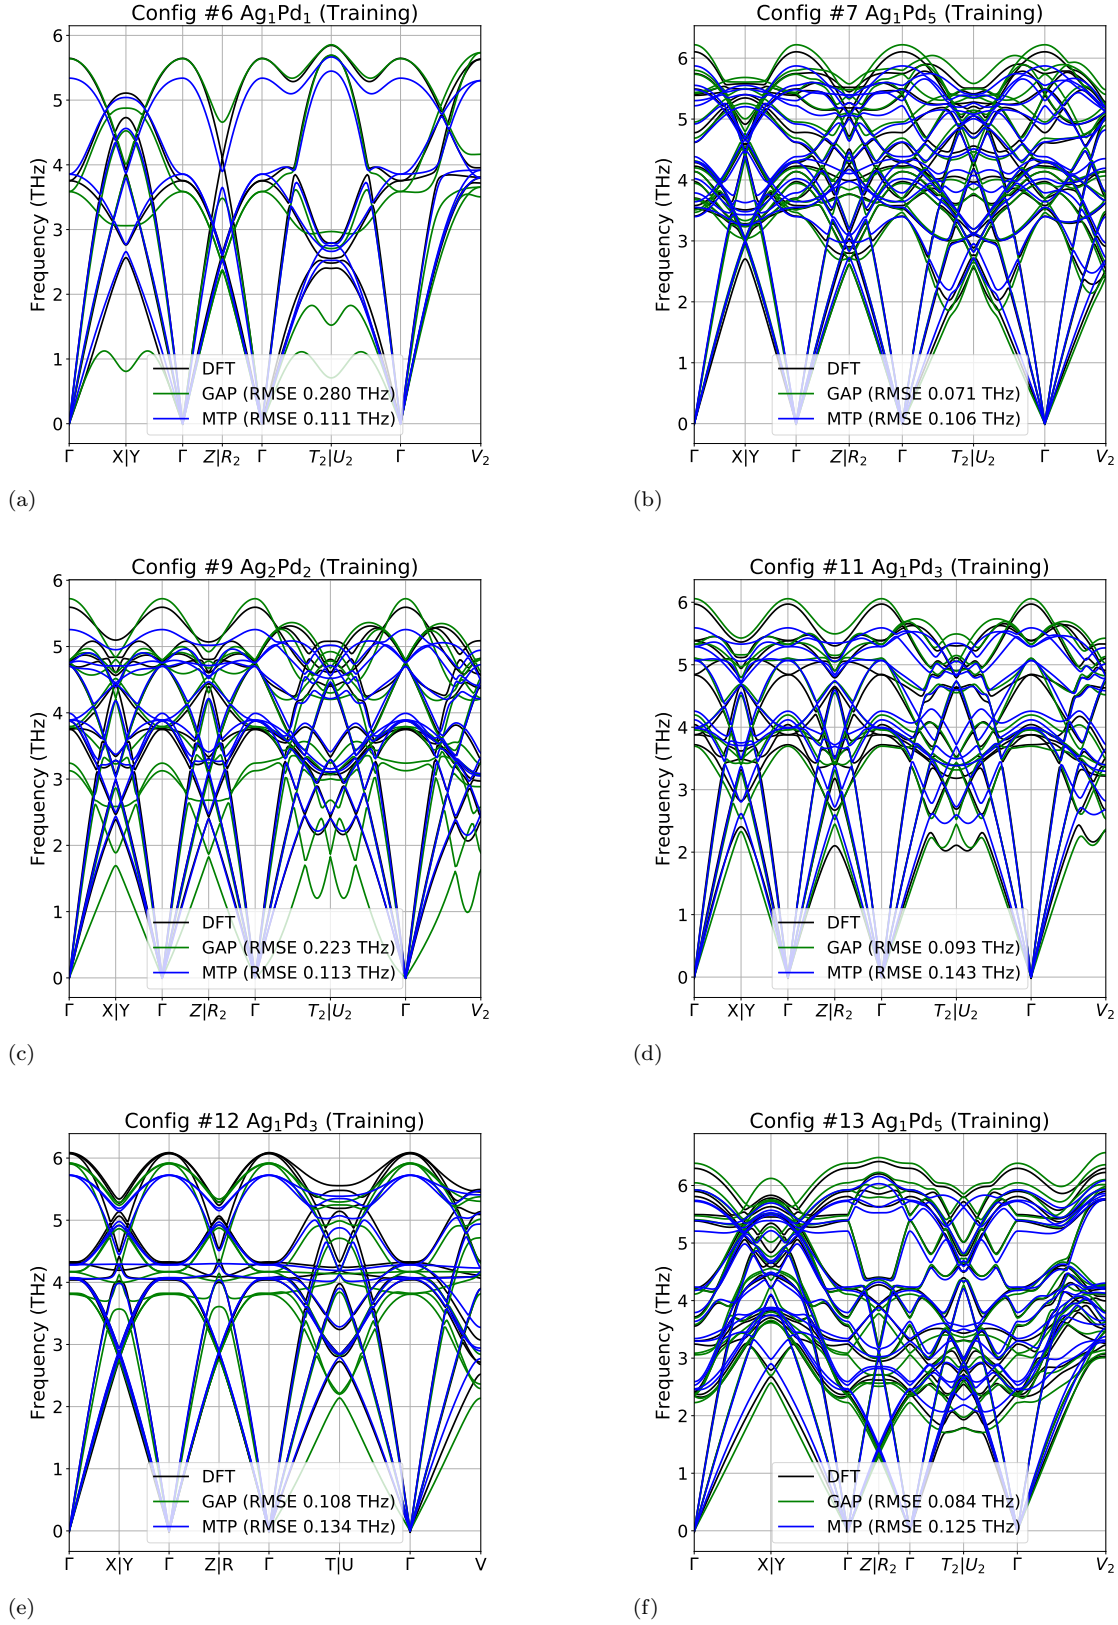

FIG. 2: Phonon predictions for selected configurations.

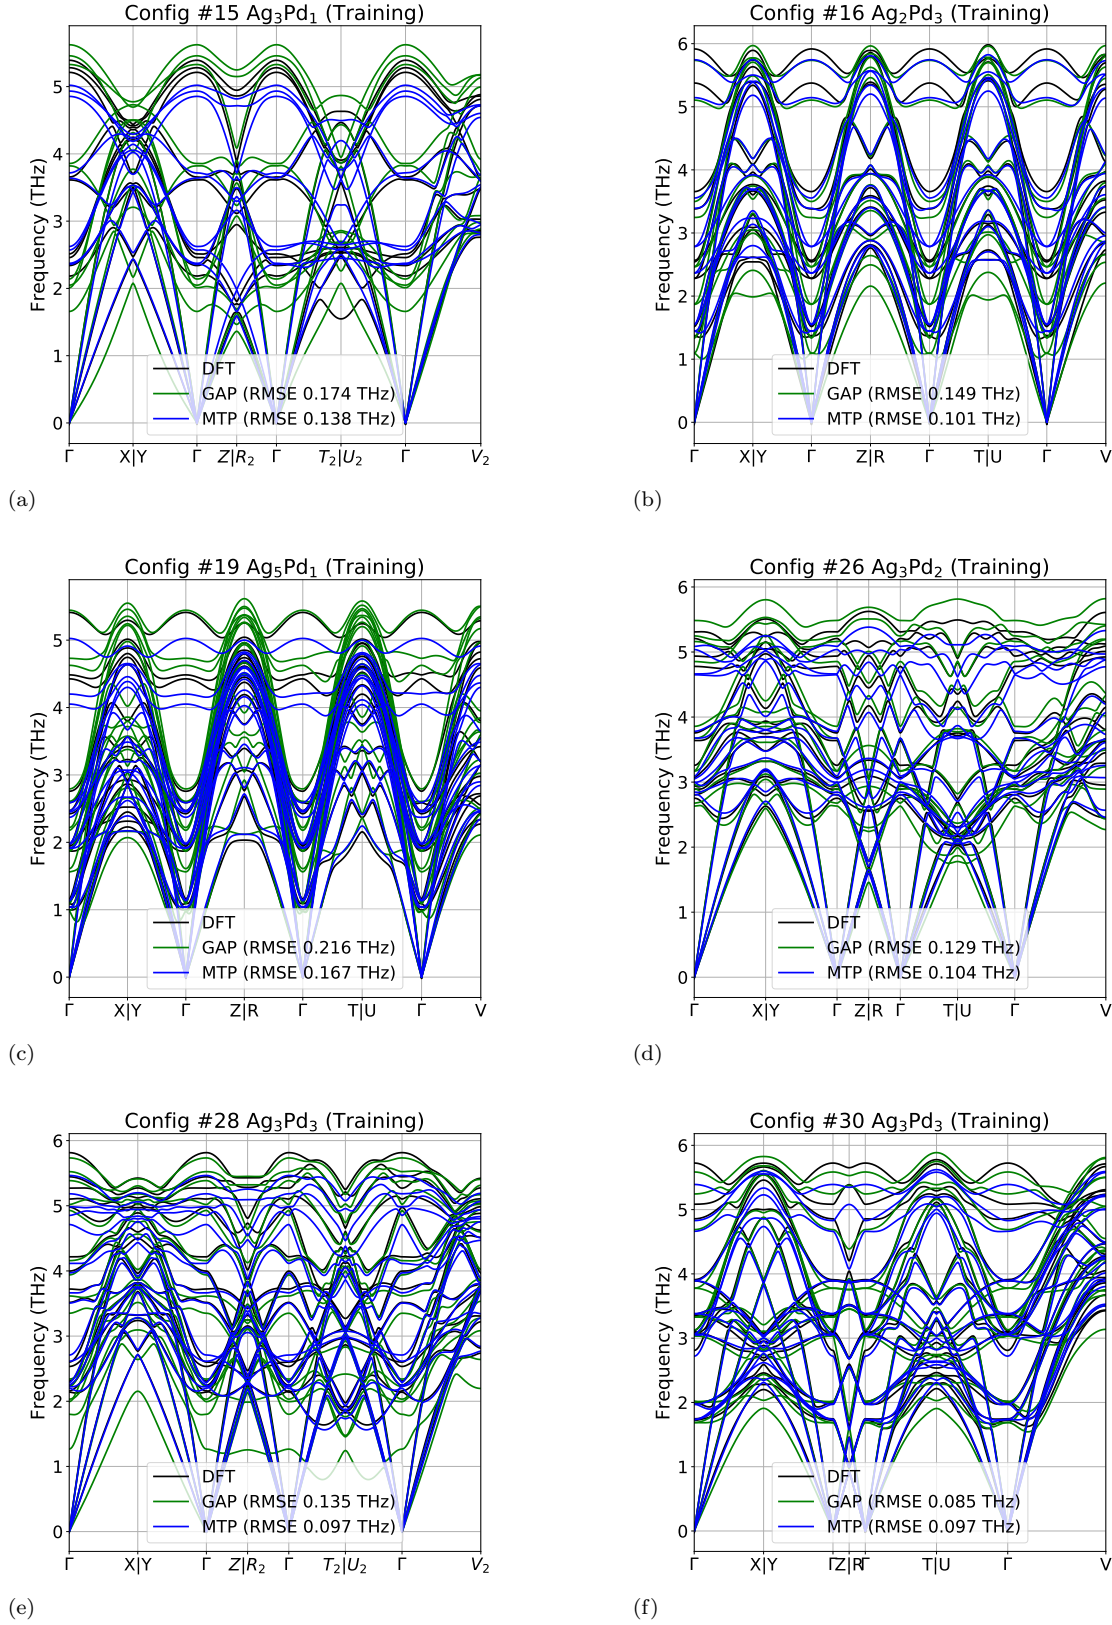

FIG. 3: Phonon predictions for selected configurations.



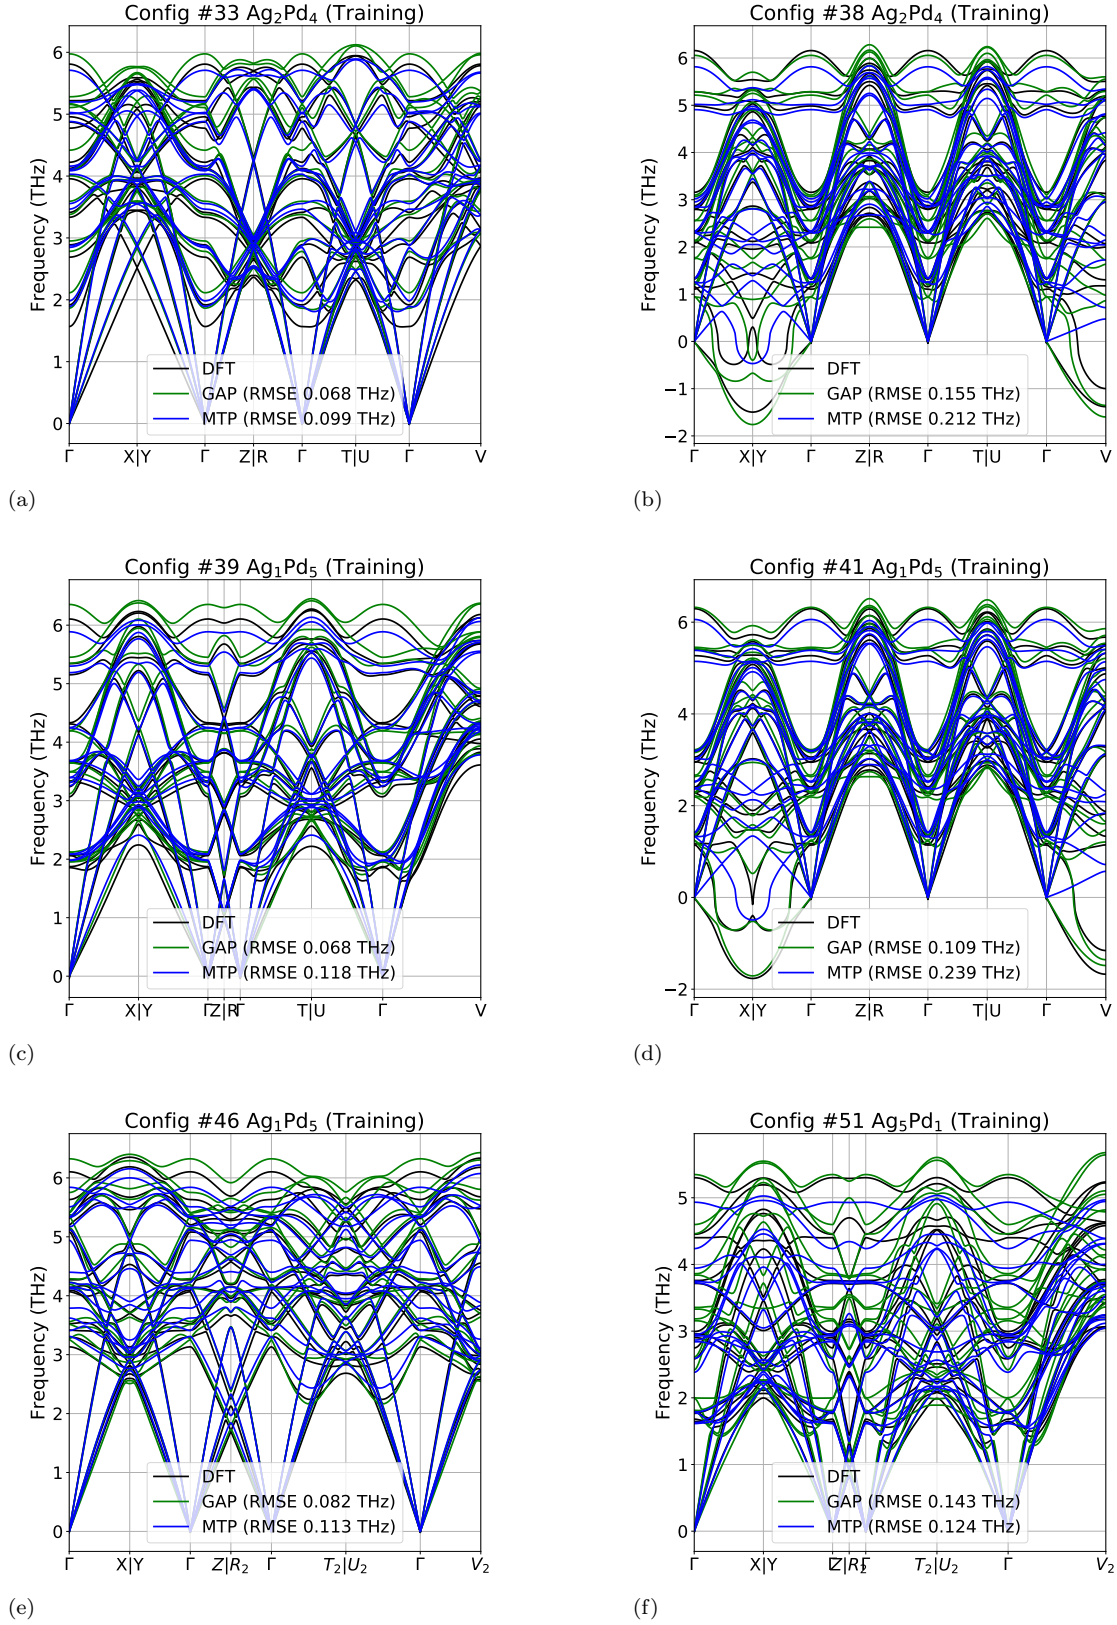

FIG. 4: Phonon predictions for selected configurations.

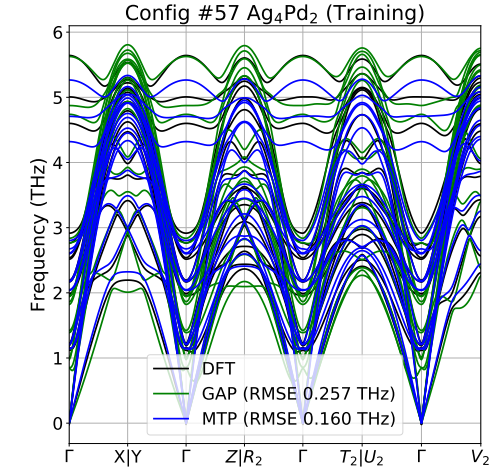

(a)

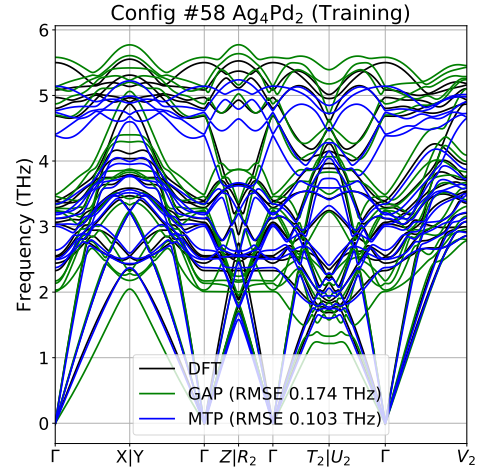

(b)

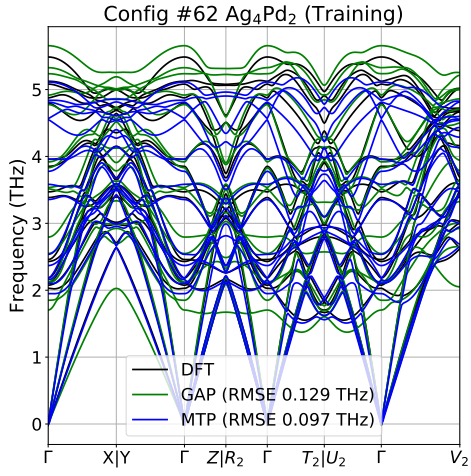

(c)

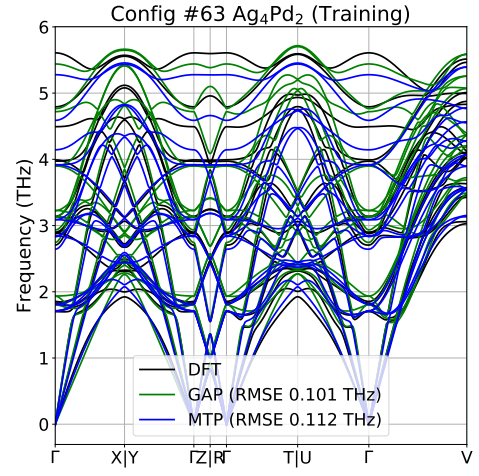

(d)

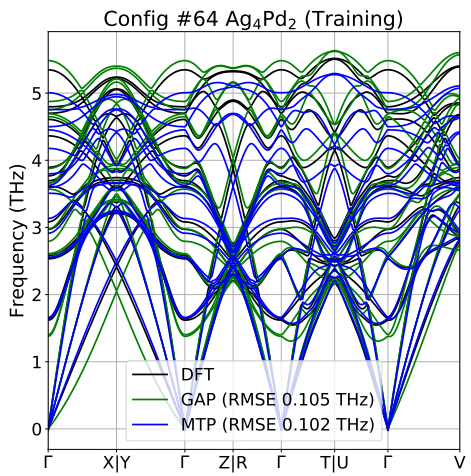

(e)

(f)

FIG. 5: Phonon predictions for selected configurations.

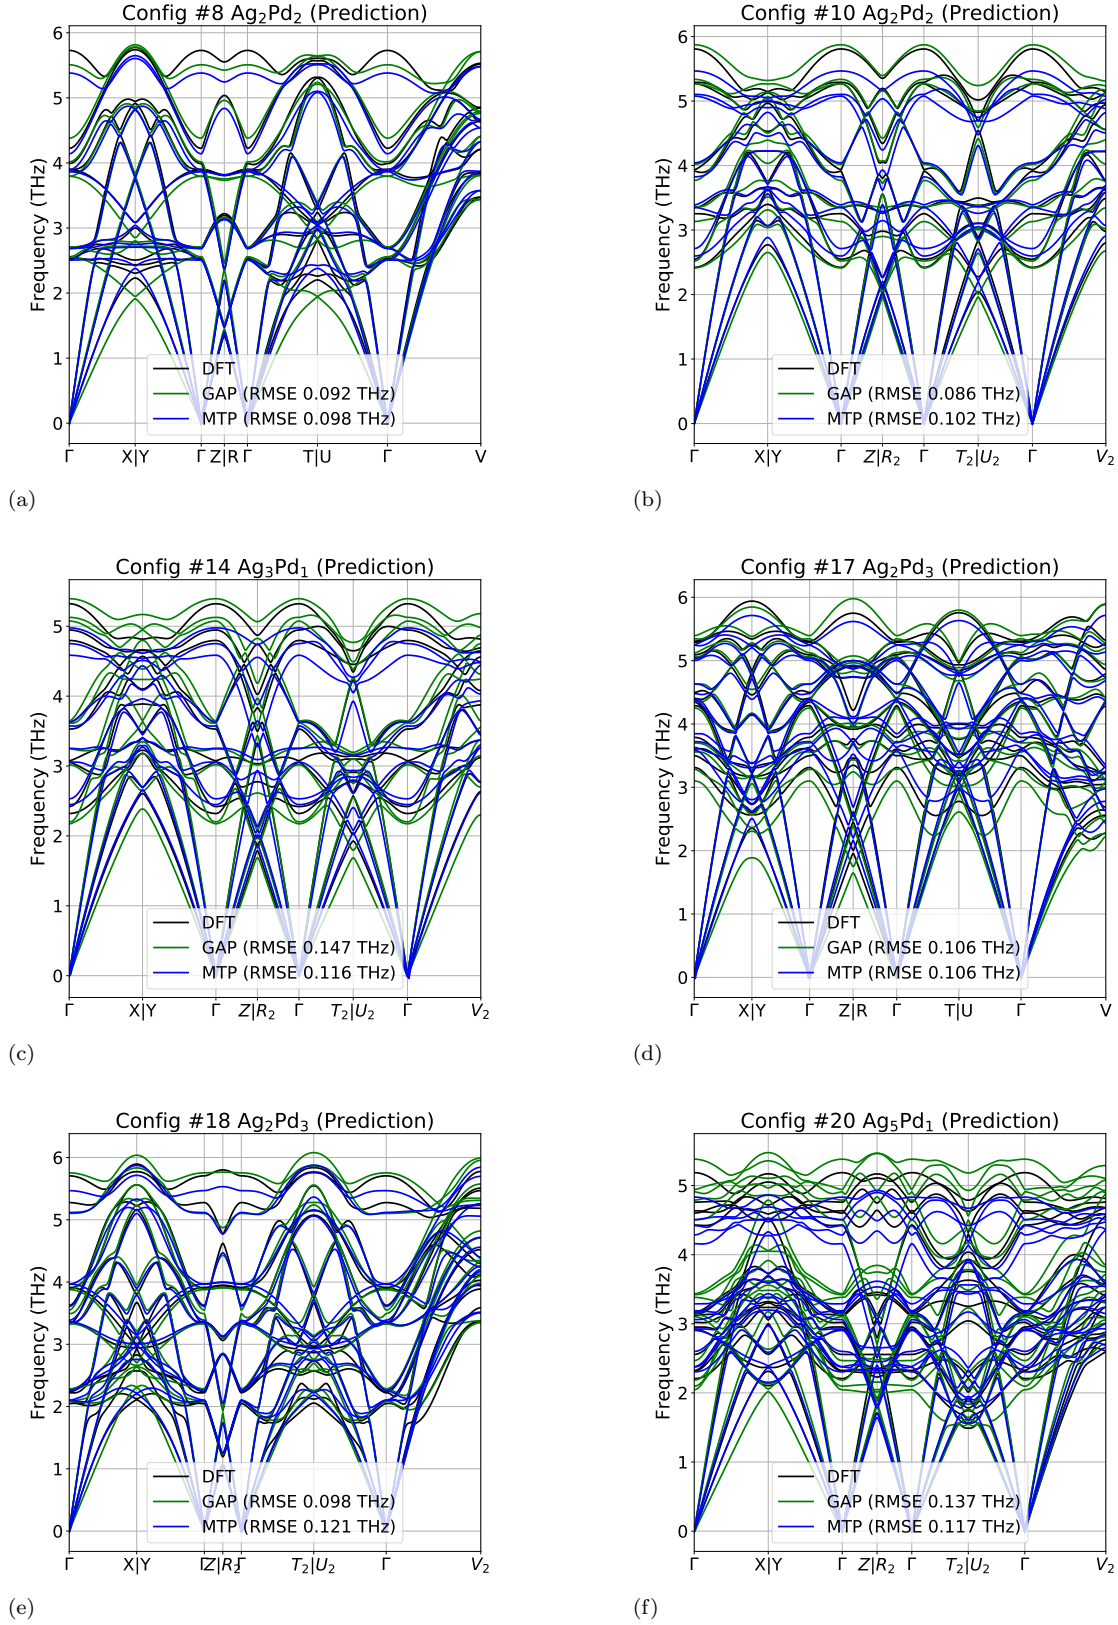

FIG. 6: Phonon predictions for selected configurations.



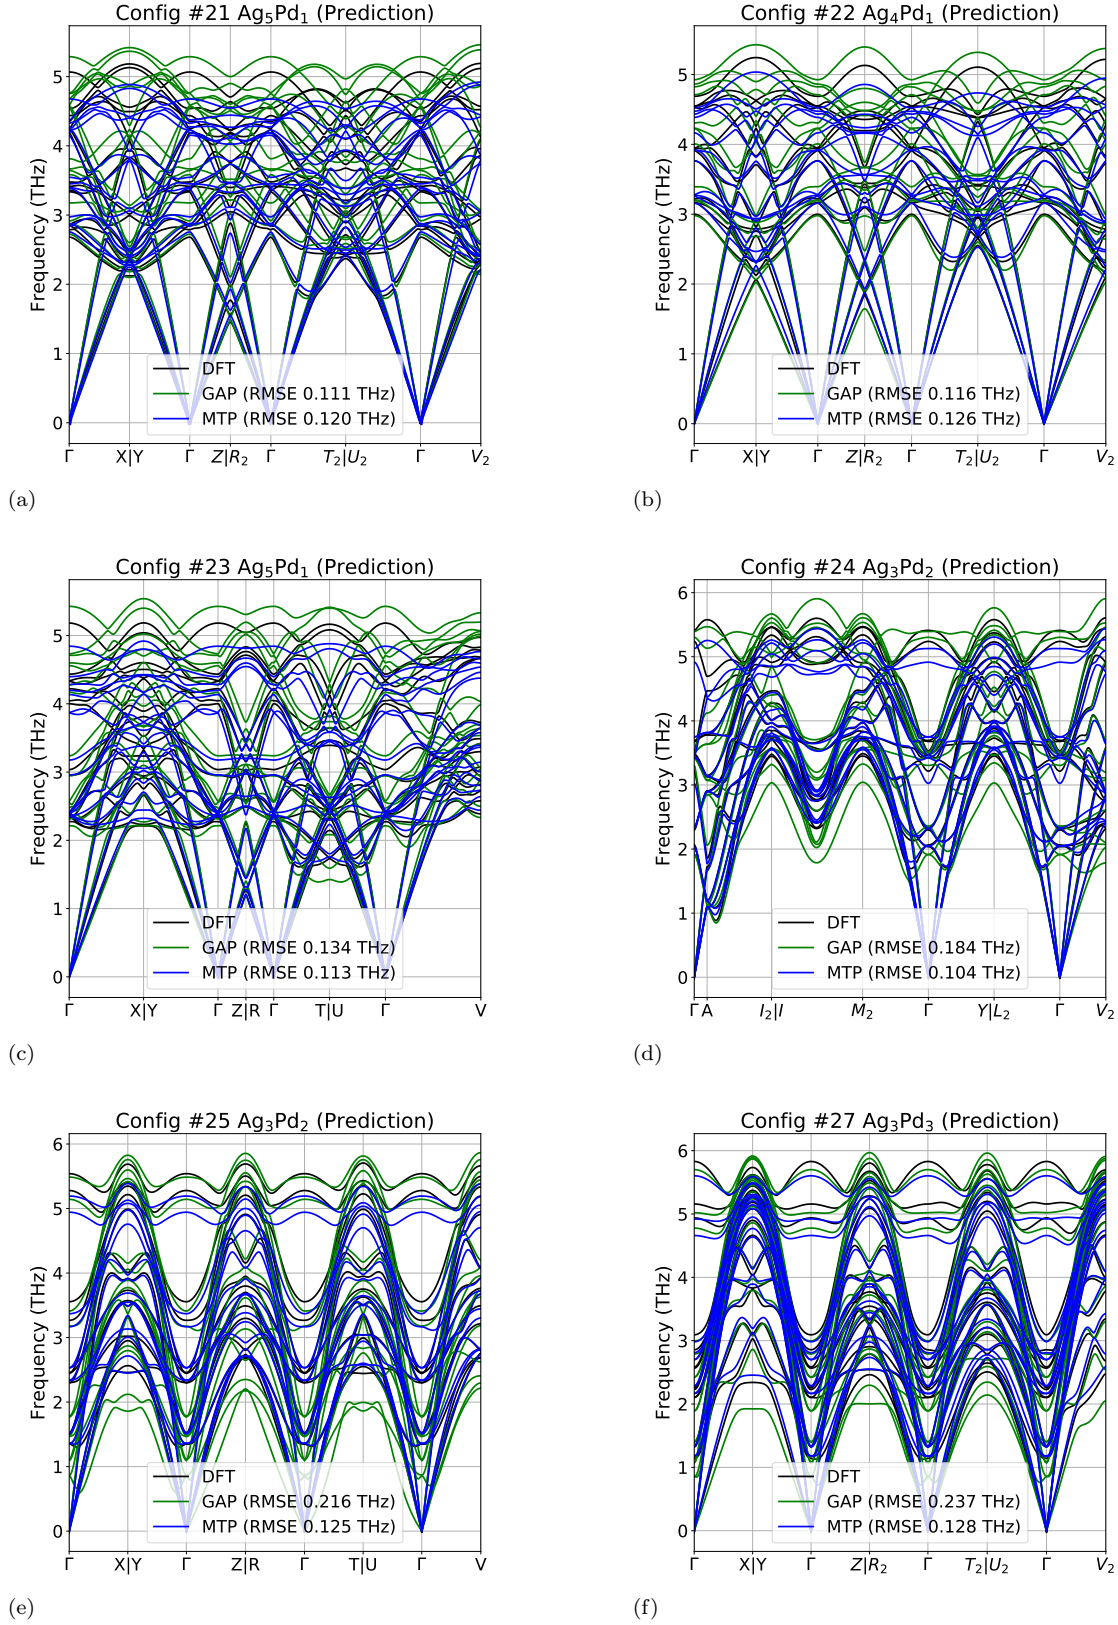

FIG. 7: Phonon predictions for selected configurations.



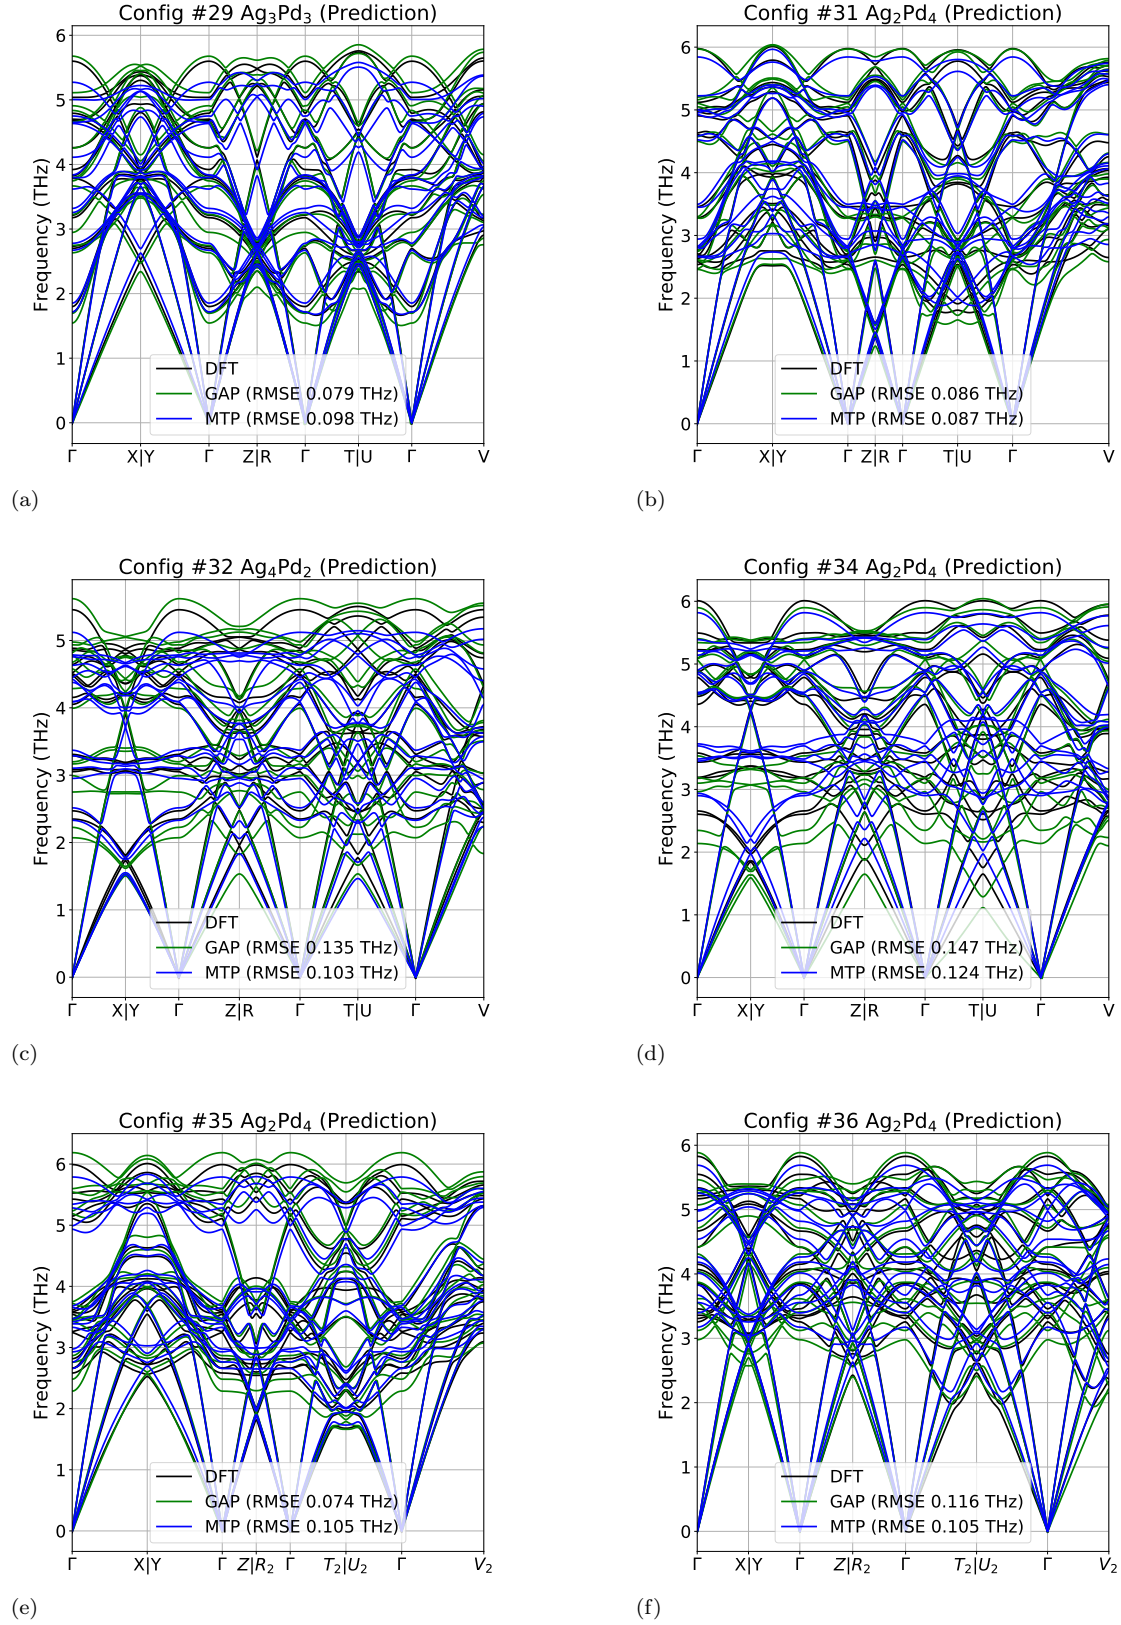

FIG. 8: Phonon predictions for selected configurations.

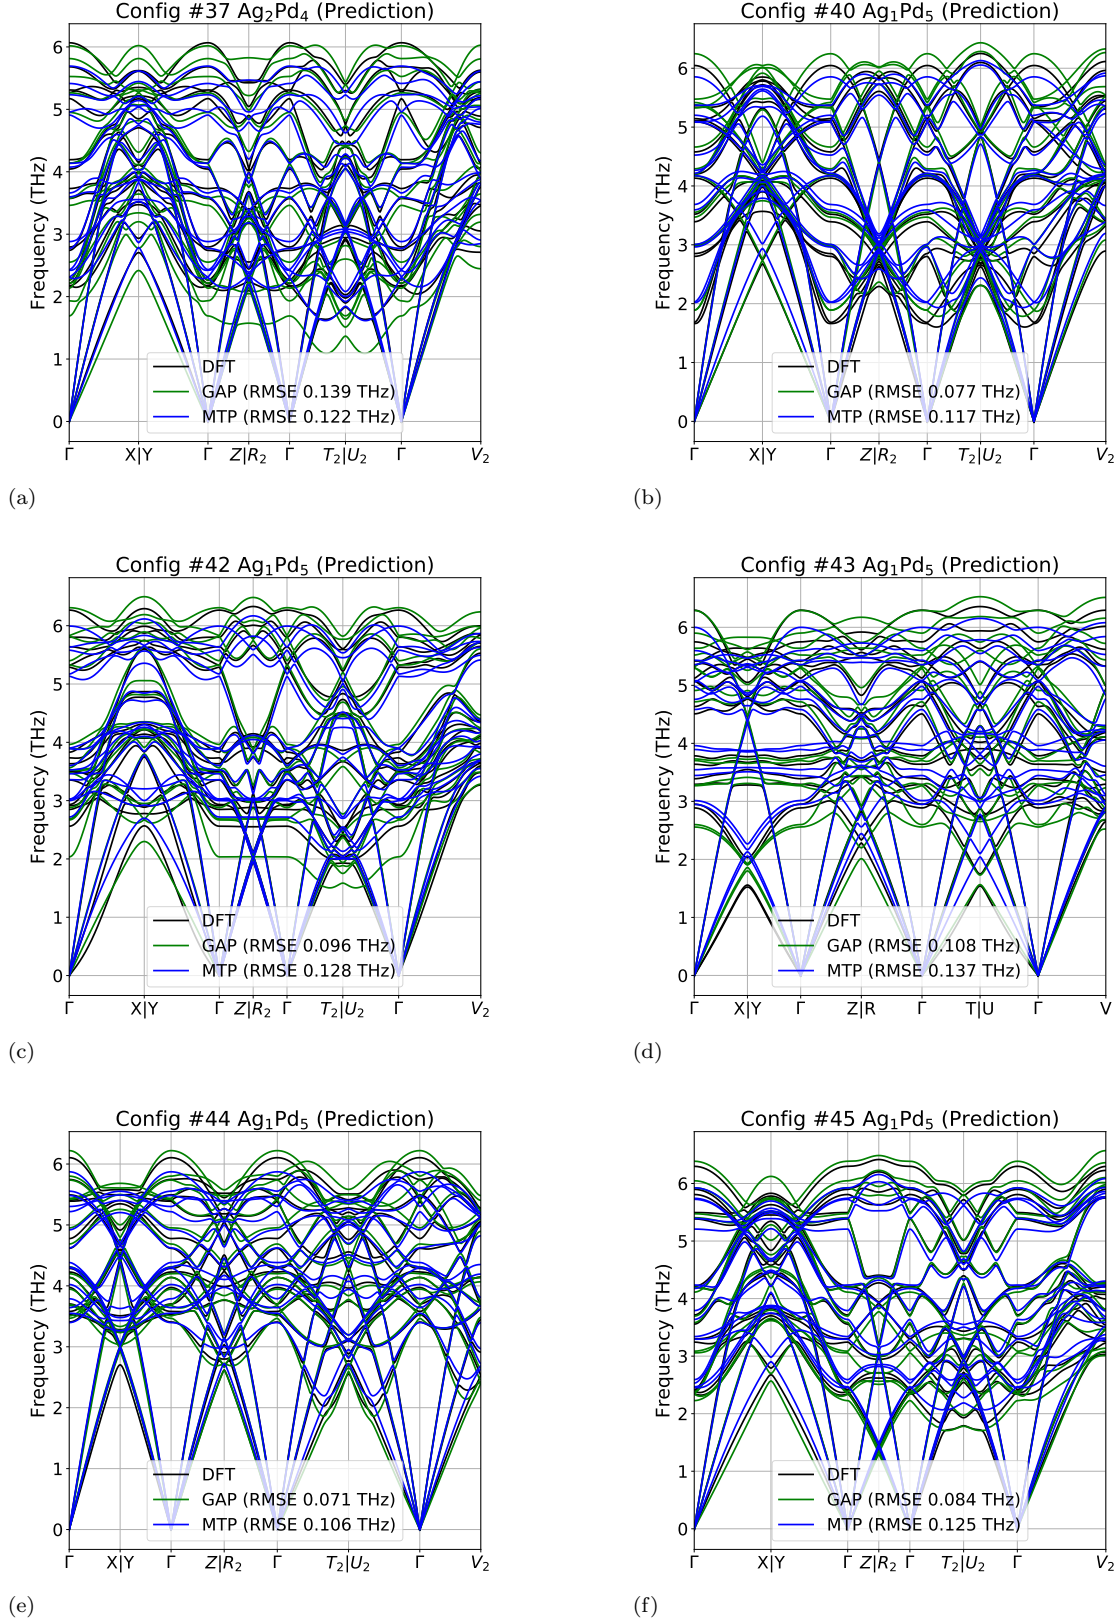

FIG. 9: Phonon predictions for selected configurations.

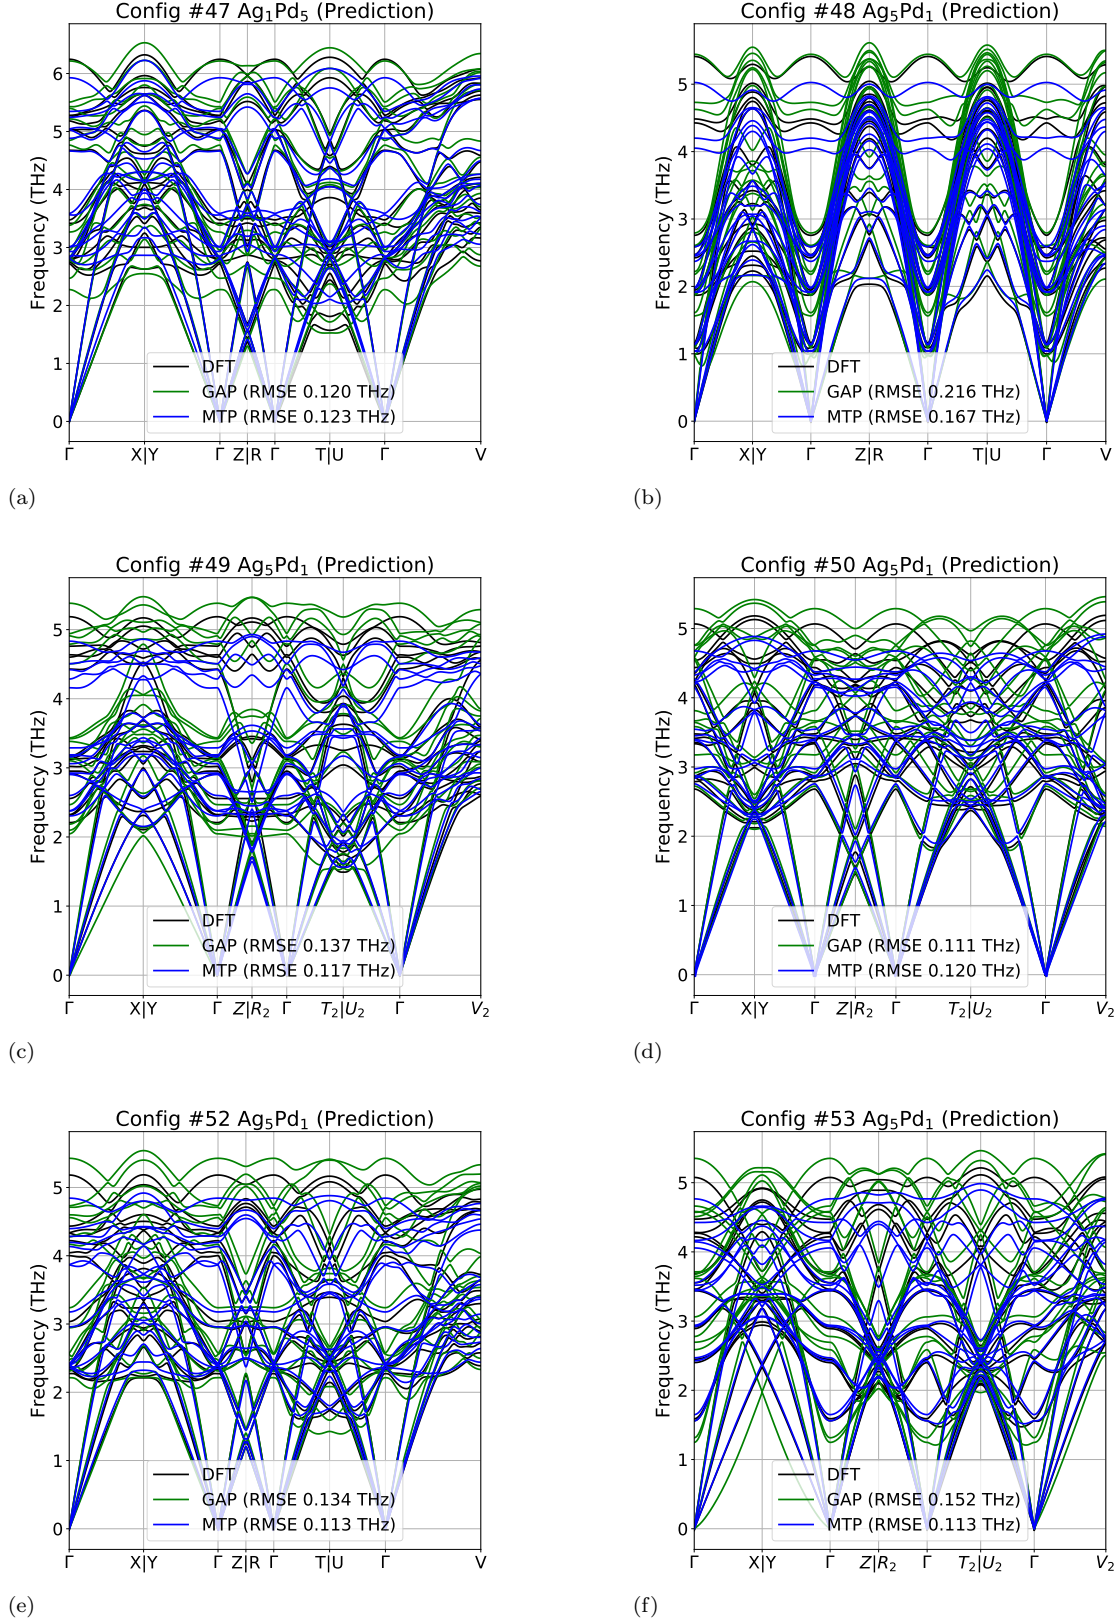

FIG. 10: Phonon predictions for selected configurations.



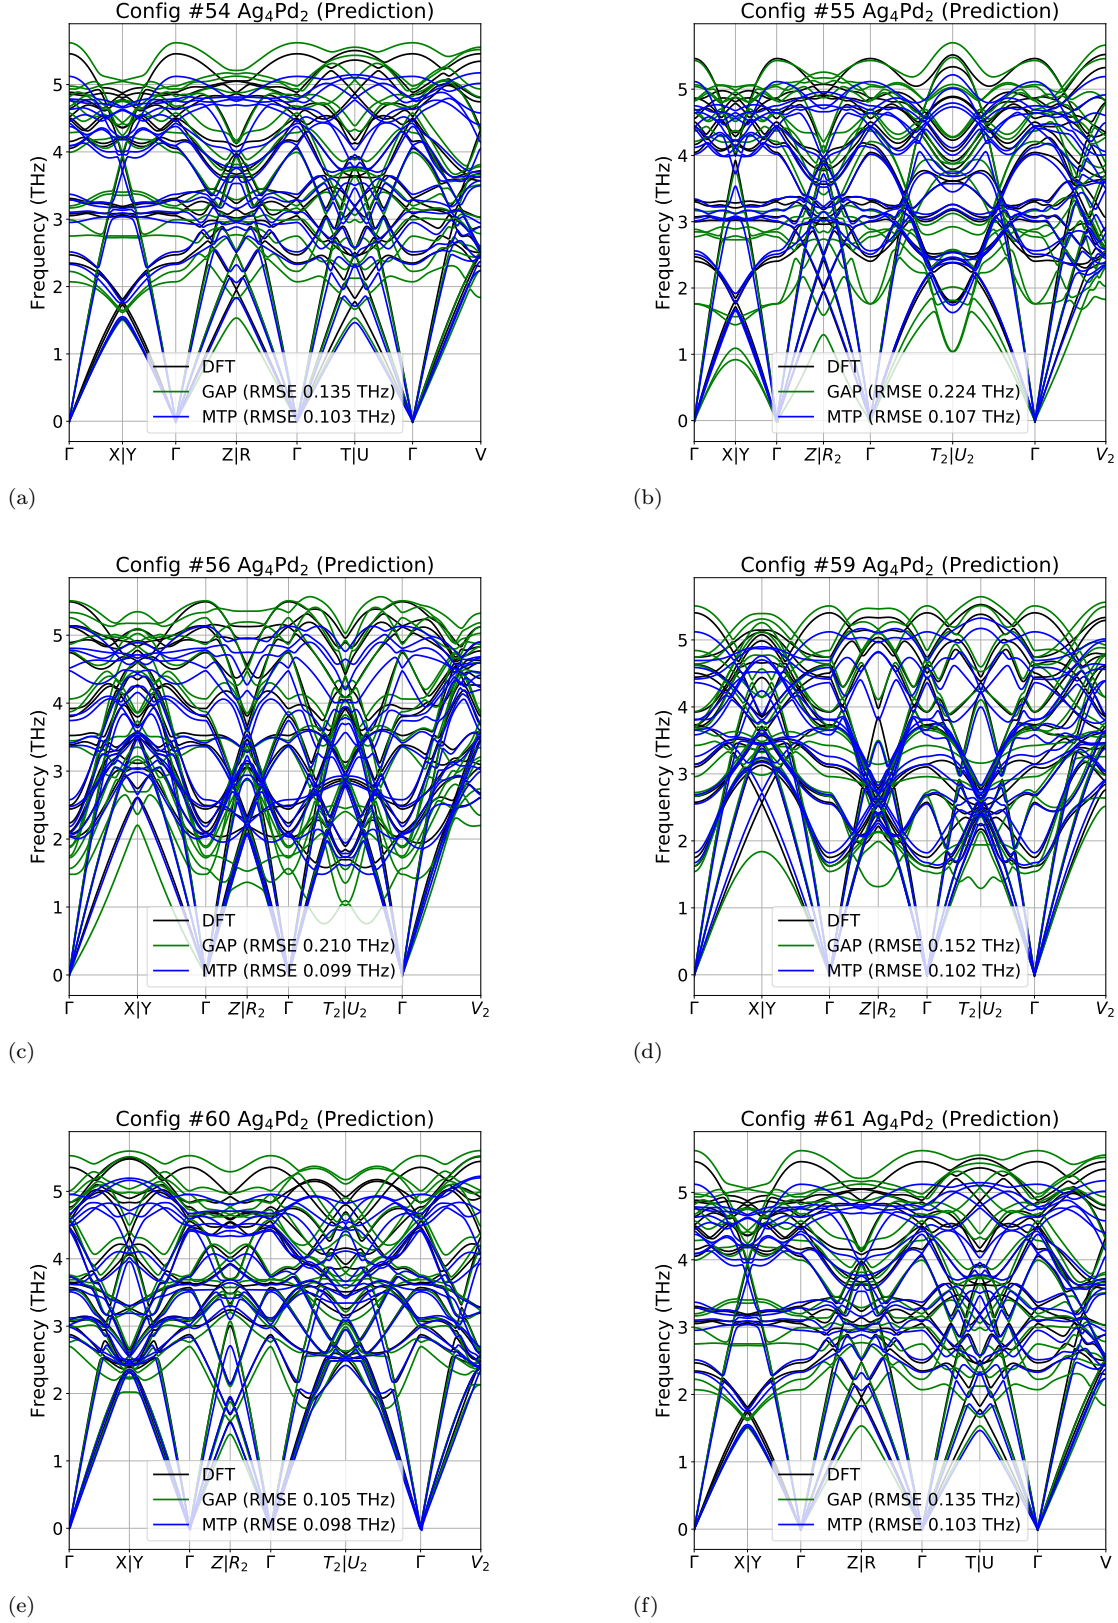

FIG. 11: Phonon predictions for selected configurations.
